# Supplementary material for: Pipeline Terracotta Microbial Fuel Cell: Organic Content Biosensor and Energy Harvesting Device Integrated in Wastewater Pipeline
Source: MDPI journal article supplement (doi:10.3390/bios14050224), 2024-04-30
Supplement: s1 [file s1]

## **Supporting Information**

### **Pipeline Terracotta Microbial Fuel Cell: Organic Content Biosensor and Energy Harvesting Device Integrated in Wastewater Pipeline**

Trang Nakamoto<sup>1</sup>, Dung Nakamoto<sup>1</sup>, and Kozo Taguchi<sup>1,\*</sup>

<sup>1</sup>Department of Electrical and Electronic Engineering, Ritsumeikan University, Kusatsu, Shiga 525-8577, Japan; n-trang@fc.ritsumei.ac.jp

\*Correspondence: taguchi@se.ritsumei.ac.jp; Tel.: (+81)77-561-5178

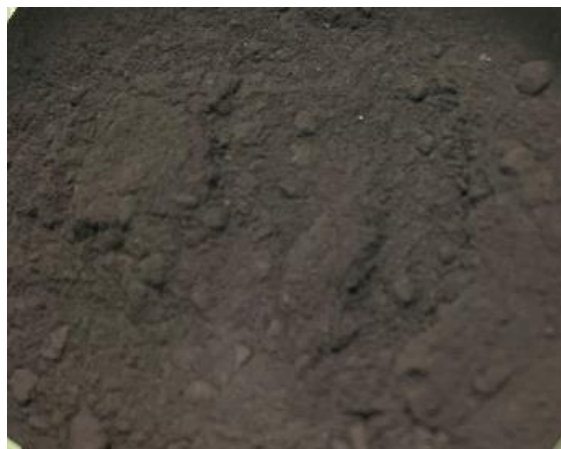

Figure S1. Photo image of the Co-MnO<sub>2</sub>/C catalyst after drying

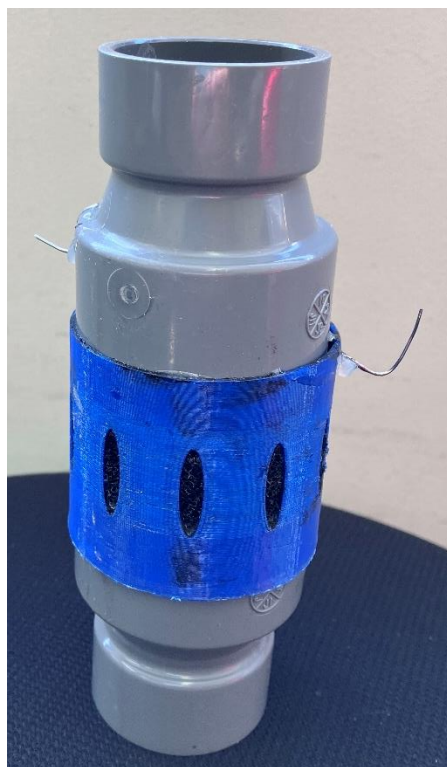

Figure S2. Photo image of another shape of an MFCP module. The MFCP is placed in the middle of the module.
